# Supplementary material for: Induction by Phenobarbital of Phase I and II Xenobiotic-Metabolizing Enzymes in Bovine Liver: An Overall Catalytic and Immunochemical Characterization
Source: MDPI journal article supplement (doi:10.3390/ijms23073564), 2022-03-24
Supplement: s1 [file s1]

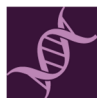

## Supplementary materials

# Induction by Phenobarbital of Phase I and II Xenobiotic-Metabolizing Enzymes in Bovine Liver: An Overall Catalytic and Immunochemical Characterization

Michela Cantiello <sup>1,†,‡</sup>, Monica Carletti <sup>1,†,§</sup>, Mery Giantin <sup>2</sup>, Giulia Gardini <sup>1</sup>, Francesca Capolongo <sup>2</sup>, Paolo Cascio <sup>1</sup>, Marianna Pauletto <sup>2</sup>, Flavia Girolami <sup>1</sup>, Mauro Dacasto <sup>2,\*</sup> and Carlo Nebbia <sup>1,\*</sup>

<sup>1</sup> Department of Veterinary Sciences, University of Turin, 10095 Grugliasco, Italy; michela.cantiello@gmail.com (M.C.); monica.carletti@irta-ricerche.it (M.C.); giulia.gardini@unito.it (G.G.); paolo.cascio@unito.it (P.C.); flavia.girolami@unito.it (F.G.)

<sup>2</sup> Department of Comparative Biomedicine and Food Science, University of Padua, 35020 Agripolis Legnaro, Italy; mery.giantin@unipd.it (M.G.); francesca.capolongo@unipd.it (F.C.); marianna.pauletto@unipd.it (M.P.)

\* Correspondence: mauro.dacasto@unipd.it (M.D.); carlo.nebbia@unito.it (C.N.)

† These authors contributed equally to this work.

‡ Current address: Eurofins Biopharma Services, 33000 Bordeaux, France.

§ Current address: IRTA Ricerche s.r.l., 10093 Collegno, Italy.

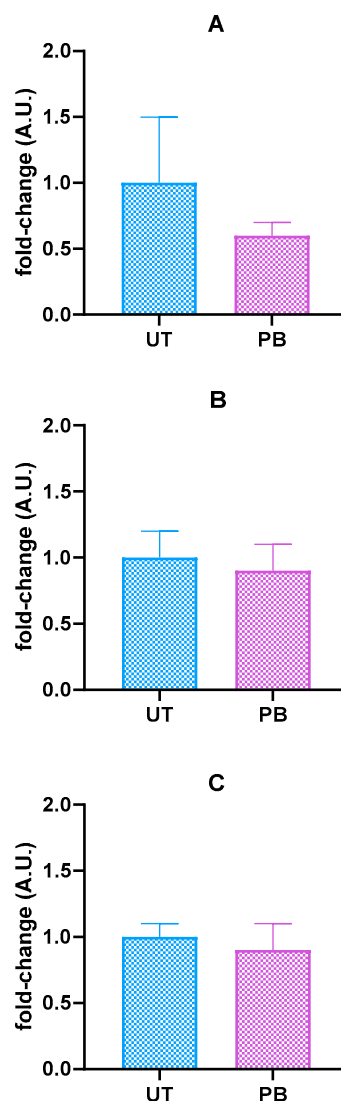

**Figure S1.** Hepatic nuclear receptors mRNA levels in untreated control (UT, n=3) and phenobarbital-treated cattle (PB, n=4). Total RNA was extracted from cattle liver aliquots; then, constitutive androstane receptor (CAR) (A), pregnane X receptor (PXR) (B), and retinoid X-receptor alpha (RXR $\alpha$ ) (C) mRNA levels were measured by using a quantitative real-time RT-PCR (qPCR) approach. Data (arithmetic means  $\pm$  SD) are expressed as n-fold change (arbitrary units, A.U.), normalized to  $\Delta\Delta C_t$  mean value of  $\beta$ -actin (ACTB, the chosen internal control gene, ICG), to whom an arbitrary value of 1 was assigned.

**Table S1.** Cytochromes P450 and  $b_5$  content, NADPH cytochrome  $c$  (P450) reductase and NADH cytochrome  $b_5$  reductase activities, and extent of metyrapone binding in untreated control (UT,  $n = 3$ ) and phenobarbital-treated (PB,  $n = 4$ ) cattle.

| Parameter                                             | UT               | PB                |
|-------------------------------------------------------|------------------|-------------------|
| total CYP <sup>†</sup>                                | 0.80 ± 0.10      | 1.63 ± 0.24**     |
| total cytochrome $b_5$ <sup>†</sup>                   | 0.35 ± 0.13      | 0.45 ± 0.08       |
| NADPH cytochrome $c$ (P450)<br>reductase <sup>‡</sup> | 81.67 ± 10.10    | 87.38 ± 13.29     |
| NADH cytochrome $b_5$ reduc-<br>tase <sup>‡</sup>     | 1077.00 ± 108.67 | 383.50 ± 75.79*** |
| metyrapone binding <sup>†</sup>                       | 0.12 ± 0.03      | 0.96 ± 0.23**     |

Data are expressed as means ± SD. CYP: cytochrome P450. \*\*  $p < 0.01$ ; \*\*\*  $p < 0.001$  (unpaired  $t$ -test).

<sup>†</sup> nmoles/mg protein. <sup>‡</sup> nmoles/min·mg protein<sup>-1</sup>.

**Table S2.** Cytochrome P450 (CYP) 1A, CYP2A, and CYP2E1 protein expression and *in vitro* metabolism of marker substrates in untreated control (UT, n = 3) and PB-treated (PB, n = 4) cattle.

| Parameter                                    | UT             | PB               |
|----------------------------------------------|----------------|------------------|
| CYP1A expression <sup>†</sup>                | 214.00 ± 33.50 | 139.50 ± 25.60*  |
| 7-ethoxyresorufin deethylation <sup>‡</sup>  | 209.72 ± 40.71 | 138.15 ± 33.01*  |
| 7-methoxyresorufin deethylation <sup>‡</sup> | 43.60 ± 1.18   | 165.57 ± 36.59** |
| benzo[a]pyrene hydroxylation <sup>§</sup>    | 1.22 ± 0.12    | 2.19 ± 0.35**    |
| 7-ethoxycoumarin deethylation <sup>#</sup>   | 0.71 ± 0.15    | 1.41 ± 0.29*     |
| CYP2A expression <sup>†</sup>                | N.A.           | N.A.             |
| coumarin hydroxylation <sup>‡</sup>          | 104.00 ± 41.00 | 95.00 ± 75.00    |
| CYP2E1 expression <sup>†</sup>               | 125.50 ± 34.40 | 363.30 ± 192.80  |
| Aniline hydroxylation <sup>#</sup>           | 0.65 ± 0.10    | 1.37 ± 0.33*     |
| 4-Aminophenol hydroxylation <sup>#</sup>     | 0.28 ± 0.05    | 0.79 ± 0.14**    |

Data are expressed as means ± SD. \*  $p < 0.05$ ; \*\*  $p < 0.01$  (unpaired *t*-test). <sup>†</sup> arbitrary units (A.U.). <sup>‡</sup> pmoles/min·mg protein<sup>-1</sup>. <sup>§</sup> µg quinine/mL. <sup>#</sup> nmoles/min·mg protein<sup>-1</sup>. N.A. not available.

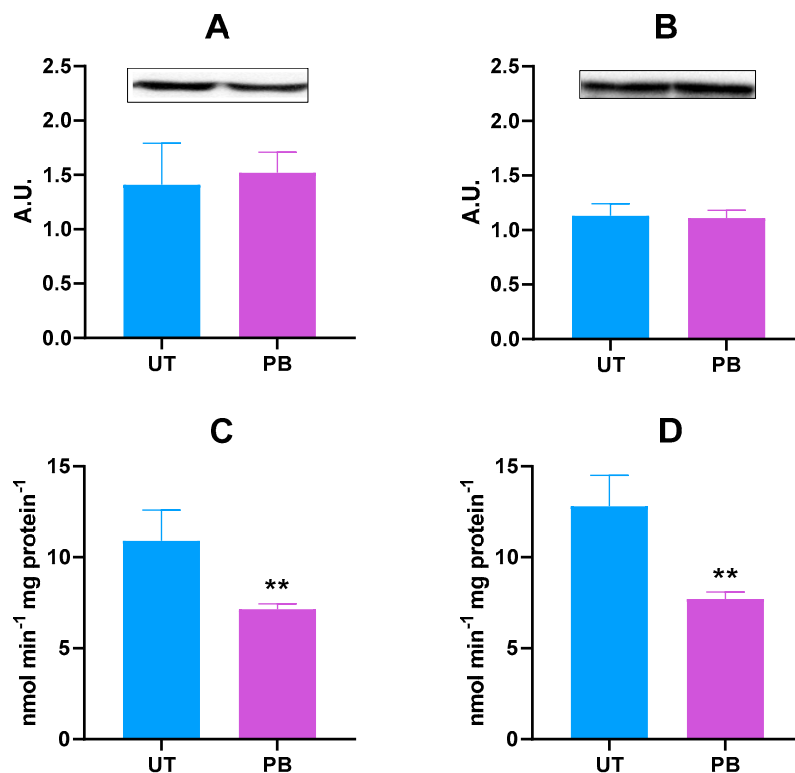

**Figure S2.** Hepatic flavin monooxygenase 1 and 3 (FMO1 and FMO3) protein expression (A-B) and *in vitro* metabolism of marker substrates ethylenethiourea and methimazole (C-D) in untreated control (UT, n=3) and phenobarbital-treated (PB, n=4) cattle. A.U., arbitrary units; ETU, ethylenethiourea; MTZ, methimazole. Data are expressed as arithmetic means  $\pm$  SD. \*\*  $p < 0.01$ ; \*\*\*  $p < 0.001$  (unpaired *t*-test).

**Table S3.** *In vitro* metabolism of carboxylesterase and epoxide hydrolase marker substrates in untreated control (UT, n = 3) and phenobarbital-treated (PB, n = 4) cattle.

| Parameter                                                    | UT             | PB             |
|--------------------------------------------------------------|----------------|----------------|
| APA hydrolysis <sup>∞</sup>                                  | 5.55 ± 0.78    | 8.18 ± 1.08*   |
| IPA hydrolysis <sup>#</sup>                                  | 334.87 ± 83.54 | 368.72 ± 18.56 |
| PNP hydrolysis <sup>∞</sup>                                  | 5.65 ± 2.39    | 6.69 ± 0.90    |
| <i>trans</i> -stilbene oxide epoxide hydrolysis <sup>#</sup> | 2.46 ± 0.08    | 1.95 ± 0.36    |

APA:  $\alpha$ -naphthylacetate; IPA: indophenyl acetate; PNP: *p*-nitrophenylacetate. Data are expressed as means  $\pm$  SD. \*  $p < 0.05$  (unpaired *t*-test). <sup>∞</sup>  $\mu$ moles/min·mg protein<sup>-1</sup>. <sup>#</sup> nmoles/min·mg protein<sup>-1</sup>.

**Table S4.** Gene acronyms, GenBank accession numbers, qPCR primers (references and oligonucleotide sequences) and amplicon size.

| Gene           | GeneBank ID  | Primer reference       | 5' → 3' primer sequence                                    | Amplicon size (bp) |
|----------------|--------------|------------------------|------------------------------------------------------------|--------------------|
| <i>ACTB</i>    | NM_173979    | Giantin et al., 2008   | F: GTCGACACCGCAACCAGTT<br>R: AAGCCGGCCTTGACAT              | 85                 |
| <i>CYP2B22</i> | NM_001075173 | Giantin et al., 2008   | F: GCGGACCTCATCCCCATT<br>R: GTGCCCTTGGAAGGATGT             | 80                 |
| <i>CYP2C18</i> | NM_001076051 | Giantin et al., 2008   | F: ATGTTAAGAACATTGGCAAATCCTT<br>R: GGCCATAGGTGTTTGAGAGATTG | 51                 |
| <i>CYP2C31</i> | XM_600421    | Giantin et al., 2008   | F: TCCCAAGGGCACAACCATA<br>R: CCTTGCCATCGTGCAGG             | 56                 |
| <i>CYP2C42</i> | XM_612374    | Giantin et al., 2008   | F: TCCCTGGACATGAACAACCC<br>R: TTGTGCTTTTCCTGTTCCATCTT      | 71                 |
| <i>CYP3A</i>   | NM_174531    | Cantiello et al., 2009 | F: GCCAGAGCCCGAGGAGTT<br>R: GCAGGTAGACGTAAGGATTTATGCT      | 77                 |
| <i>PXR</i>     | NM_001103226 | Cantiello et al. 2009  | F: TGAAGGCCTACATCGAGTTCAAC<br>R: GGCCATGATCTTCAGGAACAA     | 68                 |
| <i>CAR</i>     | NM_001079768 | Cantiello et al. 2009  | F: GAAGGACATGATCCTATCGACAGA<br>R: CGTCGCTGGGCCTGTCT        | 63                 |
| <i>RXRα</i>    | XM_881943    | Cantiello et al. 2009  | F: GCCTCAATGGTGTCTCAAAG<br>R: AGCTGTACACCCCGTAGTGCTT       | 120                |

*ACTB*: β-actin; bp: base pairs; *CAR*, constitutive androstane receptor; *CYP2B22*, cytochrome P450 2B22; *CYP2C18*, cytochrome P450 2C18; *CYP2C31*, cytochrome P450 2C31; *CYP2C42*, cytochrome P450 2C42; *CYP3A*, cytochrome P450 3A; *PXR*, pregnane X receptor; qPCR, quantitative Real time RT-PCR; *RXRα*, retinoid X-receptor alpha.
